# Supplementary material
Source: publisher figshare collection journal article supplement (https://springernature.figshare.com/ndownloader/files/28130886)
Supplement: Supplementary file 1 [file 28130886]

datetime	id	value
1572577200	2	0.025
1572577200	3	0.05
1572577200	5	0.053
1572577200	6	0.002
1572577200	9	0.021
1572578100	2	0.013
1572578100	3	0.049
1572578100	5	0.033
1572578100	6	0.003
1572578100	9	0.028
1572579000	2	0.015
1572579000	3	0.05
1572579000	5	0.031
1572579000	6	0.002
1572579000	9	0.049
1572579900	2	0.031
1572579900	3	0.05
1572579900	5	0.032
1572579900	6	0.002
1572579900	9	0.026
1572580800	2	0.038
1572580800	3	0.05
1572580800	5	0.025
1572580800	6	0.003
1572580800	9	0.02
1572581700	2	0.024
1572581700	3	0.049
1572581700	5	0.02
1572581700	6	0.002
1572581700	9	0.012
1572582600	2	0.041
1572582600	3	0.049
1572582600	5	0.021
1572582600	6	0.008
1572582600	9	0.067
1572583500	2	0.039
1572583500	3	0.049
1572583500	5	0.034
1572583500	6	0.028
1572583500	9	0.027
1572584400	2	0.037
1572584400	3	0.05
1572584400	5	0.045
1572584400	6	0.024
1572584400	9	0.012
1572585300	2	0.029
1572585300	3	0.049
1572585300	5	0.044
1572585300	6	0.003
1572585300	9	0.013
1572586200	2	0.018
1572586200	3	0.05
1572586200	5	0.033
1572586200	6	0.04
1572586200	9	0.061
1572587100	2	0.019
1572587100	3	0.05
1572587100	5	0.022
1572587100	6	0.045
1572587100	9	0.036
1572588000	2	0.028
1572588000	3	0.05
1572588000	5	0.021
1572588000	6	0.042
1572588000	9	0.006
1572588900	2	0.011
1572588900	3	0.05
1572588900	5	0.021
1572588900	6	0.042
1572588900	9	0.022
1572589800	2	0.02
1572589800	3	0.05
1572589800	5	0.022
1572589800	6	0.015
1572589800	9	0.043
1572590700	2	0.025
1572590700	3	0.051
1572590700	5	0.021
1572590700	6	0.003
1572590700	9	0.042
1572591600	2	0.011
1572591600	3	0.051
1572591600	5	0.021
1572591600	6	0.002
1572591600	9	0.013
1572592500	2	0.018
1572592500	3	0.05
1572592500	5	0.04
1572592500	6	0.002
1572592500	9	0.026
1572593400	2	0.024
1572593400	3	0.051
1572593400	5	0.045
1572593400	6	0.002
1572593400	9	0.155
1572594300	2	0.014
1572594300	3	0.051
1572594300	5	0.042
1572594300	6	0.002
1572594300	9	0.05
1572595200	2	0.014
1572595200	3	0.05
1572595200	5	0.03
1572595200	6	0.028
1572595200	9	0.029
1572596100	2	0.023
1572596100	3	0.051
1572596100	5	0.021
1572596100	6	0.042
1572596100	9	0.034
1572597000	2	0.017
1572597000	3	0.044
1572597000	5	0.022
1572597000	6	0.019
1572597000	9	0.014
1572597900	2	0.01
1572597900	3	0.0
1572597900	5	0.021
1572597900	6	0.002
1572597900	9	0.061
1572598800	2	0.023
1572598800	3	0.0
1572598800	5	0.021
1572598800	6	0.003
1572598800	9	0.037
1572599700	2	0.02
1572599700	3	0.0
1572599700	5	0.023
1572599700	6	0.009
1572599700	9	0.121
1572600600	2	0.009
1572600600	3	0.0
1572600600	5	0.022
1572600600	6	0.034
1572600600	9	0.01
1572601500	2	0.025
1572601500	3	0.0
1572601500	5	0.039
1572601500	6	0.055
1572601500	9	0.038
1572602400	2	0.091
1572602400	3	0.0
1572602400	5	0.046
1572602400	6	0.045
1572602400	9	0.056
1572603300	2	0.048
1572603300	3	0.0
1572603300	5	0.043
1572603300	6	0.048
1572603300	9	0.003
1572604200	2	0.038
1572604200	3	0.0
1572604200	5	0.029
1572604200	6	0.044
1572604200	9	0.025
1572605100	2	0.051
1572605100	3	0.0
1572605100	5	0.021
1572605100	6	0.044
1572605100	9	0.026
1572606000	2	0.051
1572606000	3	0.0
1572606000	5	0.02
1572606000	6	0.045
1572606000	9	0.042
1572606900	2	0.037
1572606900	3	0.0
1572606900	5	0.02
1572606900	6	0.022
1572606900	9	0.029
1572607800	2	0.046
1572607800	3	0.0
1572607800	5	0.02
1572607800	6	0.011
1572607800	9	0.026
1572608700	2	0.054
1572608700	3	0.0
1572608700	5	0.021
1572608700	6	0.046
1572608700	9	0.009
1572609600	2	0.038
1572609600	3	0.0
1572609600	5	0.022
1572609600	6	0.043
1572609600	9	0.03
1572610500	2	0.02
1572610500	3	0.0
1572610500	5	0.037
1572610500	6	0.042
1572610500	9	0.058
1572611400	2	0.025
1572611400	3	0.0
1572611400	5	0.057
1572611400	6	0.002
1572611400	9	0.01
1572612300	2	0.016
1572612300	3	0.0
1572612300	5	0.049
1572612300	6	0.01
1572612300	9	0.015
1572613200	2	0.015
1572613200	3	0.0
1572613200	5	0.037
1572613200	6	0.043
1572613200	9	0.026
1572614100	2	0.024
1572614100	3	0.0
1572614100	5	0.023
1572614100	6	0.042
1572614100	9	0.06
1572615000	2	0.022
1572615000	3	0.0
1572615000	5	0.023
1572615000	6	0.002
1572615000	9	0.012
1572615900	2	0.011
1572615900	3	0.0
1572615900	5	0.022
1572615900	6	0.003
1572615900	9	0.025
1572616800	2	0.021
1572616800	3	0.0
1572616800	5	0.025
1572616800	6	0.006
1572616800	9	0.144
1572617700	2	0.024
1572617700	3	0.0
1572617700	5	0.028
1572617700	6	0.003
1572617700	9	0.04
1572618600	2	0.016
1572618600	3	0.0
1572618600	5	0.047
1572618600	6	0.004
1572618600	9	0.042
1572619500	2	0.015
1572619500	3	0.0
1572619500	5	0.047
1572619500	6	0.011
1572619500	9	0.024
1572620400	2	0.024
1572620400	3	0.0
1572620400	5	0.05
1572620400	6	0.047
1572620400	9	0.005
1572621300	2	0.021
1572621300	3	0.0
1572621300	5	0.031
1572621300	6	0.043
1572621300	9	0.046
1572622200	2	0.011
1572622200	3	0.0
1572622200	5	0.022
1572622200	6	0.042
1572622200	9	0.052
1572623100	2	0.021
1572623100	3	0.0
1572623100	5	0.022
1572623100	6	0.046
1572623100	9	0.009
1572624000	2	0.052
1572624000	3	0.0
1572624000	5	0.022
1572624000	6	0.043
1572624000	9	0.017
1572624900	2	0.042
1572624900	3	0.0
1572624900	5	0.02
1572624900	6	0.007
1572624900	9	0.057
1572625800	2	0.044
1572625800	3	0.0
1572625800	5	0.021
1572625800	6	0.028
1572625800	9	0.082
1572626700	2	0.051
1572626700	3	0.0
1572626700	5	0.033
1572626700	6	0.028
1572626700	9	0.051
1572627600	2	0.046
1572627600	3	0.0
1572627600	5	0.058
1572627600	6	0.005
1572627600	9	0.052
1572628500	2	0.024
1572628500	3	0.0
1572628500	5	0.043
1572628500	6	0.029
1572628500	9	0.065
1572629400	2	0.034
1572629400	3	0.0
1572629400	5	0.042
1572629400	6	0.047
1572629400	9	0.09
1572630300	2	0.018
1572630300	3	0.0
1572630300	5	0.022
1572630300	6	0.045
1572630300	9	0.052
1572631200	2	0.033
1572631200	3	0.0
1572631200	5	0.021
1572631200	6	0.045
1572631200	9	0.053
1572632100	2	0.04
1572632100	3	0.0
1572632100	5	0.021
1572632100	6	0.044
1572632100	9	0.063
1572633000	2	0.04
1572633000	3	0.0
1572633000	5	0.021
1572633000	6	0.008
1572633000	9	0.093
1572633900	2	0.039
1572633900	3	0.0
1572633900	5	0.022
1572633900	6	0.003
1572633900	9	0.052
1572634800	2	0.024
1572634800	3	0.0
1572634800	5	0.021
1572634800	6	0.039
1572634800	9	0.053
1572635700	2	0.03
1572635700	3	0.0
1572635700	5	0.041
1572635700	6	0.037
1572635700	9	0.061
1572636600	2	0.041
1572636600	3	0.0
1572636600	5	0.044
1572636600	6	0.002
1572636600	9	0.094
1572637500	2	0.069
1572637500	3	0.0
1572637500	5	0.043
1572637500	6	0.003
1572637500	9	0.052
1572638400	2	0.051
1572638400	3	0.0
1572638400	5	0.042
1572638400	6	0.003
1572638400	9	0.052
1572639300	2	0.072
1572639300	3	0.0
1572639300	5	0.054
1572639300	6	0.033
1572639300	9	0.062
1572640200	2	0.068
1572640200	3	0.0
1572640200	5	0.041
1572640200	6	0.051
1572640200	9	0.095
1572641100	2	0.115
1572641100	3	0.0
1572641100	5	0.034
1572641100	6	0.025
1572641100	9	0.052
1572642000	2	0.066
1572642000	3	0.0
1572642000	5	0.383
1572642000	6	0.011
1572642000	9	0.052
1572642900	2	0.065
1572642900	3	0.0
1572642900	5	0.431
1572642900	6	0.101
1572642900	9	0.195
1572643800	2	0.065
1572643800	3	0.0
1572643800	5	0.022
1572643800	6	0.011
1572643800	9	0.094
1572644700	2	0.064
1572644700	3	0.0
1572644700	5	0.026
1572644700	6	0.011
1572644700	9	0.052
1572645600	2	0.063
1572645600	3	0.0
1572645600	5	0.047
1572645600	6	0.011
1572645600	9	0.051
1572646500	2	0.04
1572646500	3	0.006
1572646500	5	0.048
1572646500	6	0.011
1572646500	9	0.062
1572647400	2	0.065
1572647400	3	0.042
1572647400	5	0.046
1572647400	6	0.011
1572647400	9	0.098
1572648300	2	0.069
1572648300	3	0.049
1572648300	5	0.044
1572648300	6	0.011
1572648300	9	0.075
1572649200	2	0.024
1572649200	3	0.049
1572649200	5	0.051
1572649200	6	0.054
1572649200	9	0.096
1572650100	2	0.048
1572650100	3	0.049
1572650100	5	0.06
1572650100	6	0.059
1572650100	9	0.063
1572651000	2	0.023
1572651000	3	0.048
1572651000	5	0.066
1572651000	6	0.061
1572651000	9	0.091
1572651900	2	0.048
1572651900	3	0.049
1572651900	5	0.087
1572651900	6	0.043
1572651900	9	0.052
1572652800	2	0.026
1572652800	3	0.048
1572652800	5	0.098
1572652800	6	0.034
1572652800	9	0.053
1572653700	2	0.045
1572653700	3	0.048
1572653700	5	0.102
1572653700	6	0.033
1572653700	9	0.067
1572654600	2	0.026
1572654600	3	0.048
1572654600	5	0.975
1572654600	6	0.033
1572654600	9	0.102
1572655500	2	0.044
1572655500	3	0.048
1572655500	5	0.783
1572655500	6	0.034
1572655500	9	0.055
1572656400	2	0.024
1572656400	3	0.049
1572656400	5	0.074
1572656400	6	0.024
1572656400	9	0.045
1572657300	2	0.046
1572657300	3	0.048
1572657300	5	0.075
1572657300	6	0.055
1572657300	9	0.036
1572658200	2	0.026
1572658200	3	0.049
1572658200	5	0.069
1572658200	6	0.057
1572658200	9	0.06
1572659100	2	0.04
1572659100	3	0.049
1572659100	5	0.052
1572659100	6	0.057
1572659100	9	0.324
1572660000	2	0.013
1572660000	3	0.049
1572660000	5	0.054
1572660000	6	0.102
1572660000	9	0.071
1572660900	2	0.023
1572660900	3	0.049
1572660900	5	0.04
1572660900	6	0.202
1572660900	9	0.028
1572661800	2	0.02
1572661800	3	0.049
1572661800	5	0.022
1572661800	6	0.005
1572661800	9	0.149
1572662700	2	0.014
1572662700	3	0.048
1572662700	5	0.028
1572662700	6	0.004
1572662700	9	0.025
1572663600	2	0.028
1572663600	3	0.05
1572663600	5	0.06
1572663600	6	0.004
1572663600	9	0.005
1572664500	2	0.008
1572664500	3	0.048
1572664500	5	0.054
1572664500	6	0.003
1572664500	9	0.049
1572665400	2	0.025
1572665400	3	0.05
1572665400	5	0.052
1572665400	6	0.009
1572665400	9	0.054
1572666300	2	0.017
1572666300	3	0.048
1572666300	5	0.043
1572666300	6	0.042
1572666300	9	0.005
1572667200	2	0.013
1572667200	3	0.049
1572667200	5	0.032
1572667200	6	0.041
1572667200	9	0.029
1572668100	2	0.028
1572668100	3	0.049
1572668100	5	0.05
1572668100	6	0.007
1572668100	9	0.142
1572669000	2	0.009
1572669000	3	0.049
1572669000	5	0.043
1572669000	6	0.002
1572669000	9	0.04
1572669900	2	0.02
1572669900	3	0.049
1572669900	5	0.033
1572669900	6	0.003
1572669900	9	0.032
1572670800	2	0.021
1572670800	3	0.049
1572670800	5	0.033
1572670800	6	0.002
1572670800	9	0.005
1572671700	2	0.008
1572671700	3	0.048
1572671700	5	0.051
1572671700	6	0.002
1572671700	9	0.044
1572672600	2	0.025
1572672600	3	0.049
1572672600	5	0.057
1572672600	6	0.003
1572672600	9	0.055
1572673500	2	0.016
1572673500	3	0.049
1572673500	5	0.055
1572673500	6	0.002
1572673500	9	0.006
1572674400	2	0.012
1572674400	3	0.049
1572674400	5	0.049
1572674400	6	0.002
1572674400	9	0.031
1572675300	2	0.025
1572675300	3	0.049
1572675300	5	0.033
1572675300	6	0.027
1572675300	9	0.026
1572676200	2	0.011
1572676200	3	0.048
1572676200	5	0.033
1572676200	6	0.042
1572676200	9	0.055
1572677100	2	0.016
1572677100	3	0.05
1572677100	5	0.033
1572677100	6	0.032
1572677100	9	0.015
1572678000	2	0.024
1572678000	3	0.049
1572678000	5	0.034
1572678000	6	0.002
1572678000	9	0.022
1572678900	2	0.007
1572678900	3	0.05
1572678900	5	0.033
1572678900	6	0.003
1572678900	9	0.026
1572679800	2	0.02
1572679800	3	0.049
1572679800	5	0.036
1572679800	6	0.002
1572679800	9	0.056
1572680700	2	0.163
1572680700	3	0.049
1572680700	5	0.058
1572680700	6	0.002
1572680700	9	0.007
1572681600	2	0.187
1572681600	3	0.049
1572681600	5	0.056
1572681600	6	0.002
1572681600	9	0.028
1572682500	2	0.203
1572682500	3	0.05
1572682500	5	0.054
1572682500	6	0.003
1572682500	9	0.025
1572683400	2	0.198
1572683400	3	0.049
1572683400	5	0.04
1572683400	6	0.002
1572683400	9	0.056
1572684300	2	0.188
1572684300	3	0.05
1572684300	5	0.033
1572684300	6	0.002
1572684300	9	0.009
1572685200	2	0.202
1572685200	3	0.048
1572685200	5	0.034
1572685200	6	0.023
1572685200	9	0.025
1572686100	2	0.193
1572686100	3	0.04
1572686100	5	0.034
1572686100	6	0.042
1572686100	9	0.031
1572687000	2	0.215
1572687000	3	0.049
1572687000	5	0.034
1572687000	6	0.039
1572687000	9	0.048
1572687900	2	0.215
1572687900	3	0.005
1572687900	5	0.034
1572687900	6	0.006
1572687900	9	0.023
1572688800	2	0.106
1572688800	3	0.001
1572688800	5	0.045
1572688800	6	0.031
1572688800	9	0.143
1572689700	2	0.039
1572689700	3	0.001
1572689700	5	0.058
1572689700	6	0.04
1572689700	9	0.04
1572690600	2	0.037
1572690600	3	0.0
1572690600	5	0.057
1572690600	6	0.033
1572690600	9	0.04
1572691500	2	0.034
1572691500	3	0.001
1572691500	5	0.055
1572691500	6	0.021
1572691500	9	0.03
1572692400	2	0.012
1572692400	3	0.001
1572692400	5	0.035
1572692400	6	0.005
1572692400	9	0.007
1572693300	2	0.03
1572693300	3	0.001
1572693300	5	0.034
1572693300	6	0.049
1572693300	9	0.024
1572694200	2	0.055
1572694200	3	0.0
1572694200	5	0.034
1572694200	6	0.047
1572694200	9	0.073
1572695100	2	0.035
1572695100	3	0.001
1572695100	5	0.025
1572695100	6	0.055
1572695100	9	0.01
1572696000	2	0.007
1572696000	3	0.001
1572696000	5	0.022
1572696000	6	0.05
1572696000	9	0.029
1572696900	2	0.029
1572696900	3	0.0
1572696900	5	0.033
1572696900	6	0.043
1572696900	9	0.034
1572697800	2	0.012
1572697800	3	0.001
1572697800	5	0.038
1572697800	6	0.043
1572697800	9	0.108
1572698700	2	0.025
1572698700	3	0.001
1572698700	5	0.046
1572698700	6	0.042
1572698700	9	0.048
1572699600	2	0.015
1572699600	3	0.001
1572699600	5	0.043
1572699600	6	0.041
1572699600	9	0.037
1572700500	2	0.018
1572700500	3	0.0
1572700500	5	0.04
1572700500	6	0.042
1572700500	9	0.053
1572701400	2	0.023
1572701400	3	0.0
1572701400	5	0.023
1572701400	6	0.041
1572701400	9	0.117
1572702300	2	0.007
1572702300	3	0.0
1572702300	5	0.022
1572702300	6	0.04
1572702300	9	0.117
1572703200	2	0.029
1572703200	3	0.0
1572703200	5	0.014
1572703200	6	0.041
1572703200	9	0.036
1572704100	2	0.011
1572704100	3	0.0
1572704100	5	0.007
1572704100	6	0.041
1572704100	9	0.004
1572705000	2	0.017
1572705000	3	0.0
1572705000	5	0.024
1572705000	6	0.039
1572705000	9	0.075
1572705900	2	0.023
1572705900	3	0.0
1572705900	5	0.031
1572705900	6	0.04
1572705900	9	0.03
1572706800	2	0.006
1572706800	3	0.0
1572706800	5	0.023
1572706800	6	0.054
1572706800	9	0.021
1572707700	2	0.023
1572707700	3	0.0
1572707700	5	0.034
1572707700	6	0.061
1572707700	9	0.029
1572708600	2	0.017
1572708600	3	0.0
1572708600	5	0.016
1572708600	6	0.041
1572708600	9	0.044
1572709500	2	0.01
1572709500	3	0.0
1572709500	5	0.002
1572709500	6	0.015
1572709500	9	0.04
1572710400	2	0.047
1572710400	3	0.0
1572710400	5	0.015
1572710400	6	0.017
1572710400	9	0.028
1572711300	2	0.041
1572711300	3	0.0
1572711300	5	0.001
1572711300	6	0.041
1572711300	9	0.043
1572712200	2	0.056
1572712200	3	0.0
1572712200	5	0.001
1572712200	6	0.039
1572712200	9	0.071
1572713100	2	0.034
1572713100	3	0.0
1572713100	5	0.002
1572713100	6	0.004
1572713100	9	0.061
1572714000	2	0.063
1572714000	3	0.0
1572714000	5	0.002
1572714000	6	0.002
1572714000	9	0.028
1572714900	2	0.036
1572714900	3	0.0
1572714900	5	0.027
1572714900	6	0.002
1572714900	9	0.006
1572715800	2	0.057
1572715800	3	0.0
1572715800	5	0.025
1572715800	6	0.002
1572715800	9	0.046
1572716700	2	0.037
1572716700	3	0.0
1572716700	5	0.023
1572716700	6	0.002
1572716700	9	0.042
1572717600	2	0.048
1572717600	3	0.0
1572717600	5	0.008
1572717600	6	0.003
1572717600	9	0.033
1572718500	2	0.049
1572718500	3	0.0
1572718500	5	0.001
1572718500	6	0.018
1572718500	9	0.001
1572719400	2	0.053
1572719400	3	0.0
1572719400	5	0.001
1572719400	6	0.042
1572719400	9	0.042
1572720300	2	0.013
1572720300	3	0.0
1572720300	5	0.001
1572720300	6	0.037
1572720300	9	0.042
1572721200	2	0.031
1572721200	3	0.0
1572721200	5	0.002
1572721200	6	0.029
1572721200	9	0.032
1572722100	2	0.017
1572722100	3	0.0
1572722100	5	0.003
1572722100	6	0.03
1572722100	9	0.002
1572723000	2	0.017
1572723000	3	0.0
1572723000	5	0.005
1572723000	6	0.005
1572723000	9	0.036
1572723900	2	0.029
1572723900	3	0.0
1572723900	5	0.041
1572723900	6	0.032
1572723900	9	0.046
1572724800	2	0.018
1572724800	3	0.0
1572724800	5	0.04
1572724800	6	0.046
1572724800	9	0.164
1572725700	2	0.019
1572725700	3	0.0
1572725700	5	0.039
1572725700	6	0.044
1572725700	9	0.001
1572726600	2	0.044
1572726600	3	0.0
1572726600	5	0.022
1572726600	6	0.042
1572726600	9	0.033
1572727500	2	0.04
1572727500	3	0.0
1572727500	5	0.013
1572727500	6	0.049
1572727500	9	0.044
1572728400	2	0.063
1572728400	3	0.0
1572728400	5	0.012
1572728400	6	0.326
1572728400	9	0.038
1572729300	2	0.037
1572729300	3	0.0
1572729300	5	0.012
1572729300	6	0.021
1572729300	9	0.001
1572730200	2	0.057
1572730200	3	0.0
1572730200	5	0.018
1572730200	6	0.015
1572730200	9	0.036
1572731100	2	0.042
1572731100	3	0.0
1572731100	5	0.028
1572731100	6	0.033
1572731100	9	0.062
1572732000	2	0.044
1572732000	3	0.0
1572732000	5	0.017
1572732000	6	0.056
1572732000	9	0.06
1572732900	2	0.055
1572732900	3	0.0
1572732900	5	0.522
1572732900	6	0.05
1572732900	9	0.028
1572733800	2	0.039
1572733800	3	0.0
1572733800	5	0.269
1572733800	6	0.013
1572733800	9	0.042
1572734700	2	0.063
1572734700	3	0.042
1572734700	5	0.091
1572734700	6	0.233
1572734700	9	0.056
1572735600	2	0.038
1572735600	3	0.048
1572735600	5	0.09
1572735600	6	0.049
1572735600	9	0.042
1572736500	2	0.058
1572736500	3	0.049
1572736500	5	0.075
1572736500	6	0.052
1572736500	9	0.017
1572737400	2	0.025
1572737400	3	0.048
1572737400	5	0.071
1572737400	6	0.015
1572737400	9	0.022
1572738300	2	0.042
1572738300	3	0.048
1572738300	5	0.069
1572738300	6	0.014
1572738300	9	0.036
1572739200	2	0.021
1572739200	3	0.048
1572739200	5	0.067
1572739200	6	0.005
1572739200	9	0.05
1572740100	2	0.049
1572740100	3	0.049
1572740100	5	0.069
1572740100	6	0.006
1572740100	9	0.016
1572741000	2	0.048
1572741000	3	0.048
1572741000	5	0.08
1572741000	6	0.004
1572741000	9	0.026
1572741900	2	0.035
1572741900	3	0.049
1572741900	5	0.102
1572741900	6	0.002
1572741900	9	0.022
1572742800	2	0.053
1572742800	3	0.05
1572742800	5	0.098
1572742800	6	0.033
1572742800	9	0.067
1572743700	2	0.05
1572743700	3	0.049
1572743700	5	0.101
1572743700	6	0.041
1572743700	9	0.011
1572744600	2	0.051
1572744600	3	0.05
1572744600	5	1.016
1572744600	6	0.037
1572744600	9	0.028
1572745500	2	0.047
1572745500	3	0.049
1572745500	5	0.568
1572745500	6	0.002
1572745500	9	0.008
1572746400	2	0.033
1572746400	3	0.049
1572746400	5	0.081
1572746400	6	0.002
1572746400	9	0.071
1572747300	2	0.034
1572747300	3	0.049
1572747300	5	0.074
1572747300	6	0.002
1572747300	9	0.143
1572748200	2	0.03
1572748200	3	0.05
1572748200	5	0.073
1572748200	6	0.002
1572748200	9	0.035
1572749100	2	0.039
1572749100	3	0.05
1572749100	5	0.087
1572749100	6	0.002
1572749100	9	0.004
1572750000	2	0.022
1572750000	3	0.05
1572750000	5	0.066
1572750000	6	0.003
1572750000	9	0.066
1572750900	2	0.037
1572750900	3	0.051
1572750900	5	0.056
1572750900	6	0.002
1572750900	9	0.023
1572751800	2	0.03
1572751800	3	0.049
1572751800	5	0.045
1572751800	6	0.002
1572751800	9	0.032
1572752700	2	0.024
1572752700	3	0.05
1572752700	5	0.045
1572752700	6	0.041
1572752700	9	0.0
1572753600	2	0.035
1572753600	3	0.05
1572753600	5	0.033
1572753600	6	0.041
1572753600	9	0.049
1572754500	2	0.017
1572754500	3	0.049
1572754500	5	0.023
1572754500	6	0.037
1572754500	9	0.03
1572755400	2	0.016
1572755400	3	0.05
1572755400	5	0.022
1572755400	6	0.002
1572755400	9	0.031
1572756300	2	0.027
1572756300	3	0.05
1572756300	5	0.021
1572756300	6	0.003
1572756300	9	0.0
1572757200	2	0.015
1572757200	3	0.05
1572757200	5	0.021
1572757200	6	0.002
1572757200	9	0.038
1572758100	2	0.017
1572758100	3	0.05
1572758100	5	0.021
1572758100	6	0.002
1572758100	9	0.041
1572759000	2	0.027
1572759000	3	0.05
1572759000	5	0.033
1572759000	6	0.002
1572759000	9	0.031
1572759900	2	0.014
1572759900	3	0.05
1572759900	5	0.046
1572759900	6	0.002
1572759900	9	0.0
1572760800	2	0.016
1572760800	3	0.049
1572760800	5	0.043
1572760800	6	0.002
1572760800	9	0.031
1572761700	2	0.026
1572761700	3	0.049
1572761700	5	0.042
1572761700	6	0.003
1572761700	9	0.045
1572762600	2	0.016
1572762600	3	0.05
1572762600	5	0.03
1572762600	6	0.002
1572762600	9	0.028
1572763500	2	0.014
1572763500	3	0.049
1572763500	5	0.02
1572763500	6	0.024
1572763500	9	0.006
1572764400	2	0.026
1572764400	3	0.05
1572764400	5	0.02
1572764400	6	0.043
1572764400	9	0.018
1572765300	2	0.016
1572765300	3	0.05
1572765300	5	0.02
1572765300	6	0.041
1572765300	9	0.046
1572766200	2	0.013
1572766200	3	0.049
1572766200	5	0.021
1572766200	6	0.013
1572766200	9	0.026
1572767100	2	0.025
1572767100	3	0.05
1572767100	5	0.02
1572767100	6	0.003
1572767100	9	0.019
1572768000	2	0.02
1572768000	3	0.05
1572768000	5	0.028
1572768000	6	0.002
1572768000	9	0.006
1572768900	2	0.01
1572768900	3	0.05
1572768900	5	0.059
1572768900	6	0.003
1572768900	9	0.046
1572769800	2	0.023
1572769800	3	0.05
1572769800	5	0.058
1572769800	6	0.002
1572769800	9	0.026
1572770700	2	0.023
1572770700	3	0.025
1572770700	5	0.06
1572770700	6	0.002
1572770700	9	0.032
1572771600	2	0.01
1572771600	3	0.0
1572771600	5	0.056
1572771600	6	0.002
1572771600	9	0.137
1572772500	2	0.02
1572772500	3	0.0
1572772500	5	0.032
1572772500	6	0.003
1572772500	9	0.037
1572773400	2	0.024
1572773400	3	0.0
1572773400	5	0.034
1572773400	6	0.003
1572773400	9	0.041
1572774300	2	0.013
1572774300	3	0.0
1572774300	5	0.035
1572774300	6	0.003
1572774300	9	0.03
1572775200	2	0.015
1572775200	3	0.0
1572775200	5	0.034
1572775200	6	0.004
1572775200	9	0.0
1572776100	2	0.024
1572776100	3	0.0
1572776100	5	0.023
1572776100	6	0.033
1572776100	9	0.03
1572777000	2	0.016
1572777000	3	0.0
1572777000	5	0.021
1572777000	6	0.045
1572777000	9	0.043
1572777900	2	0.011
1572777900	3	0.0
1572777900	5	0.036
1572777900	6	0.046
1572777900	9	0.034
1572778800	2	0.024
1572778800	3	0.0
1572778800	5	0.052
1572778800	6	0.058
1572778800	9	0.077
1572779700	2	0.02
1572779700	3	0.0
1572779700	5	0.044
1572779700	6	0.125
1572779700	9	0.161
1572780600	2	0.01
1572780600	3	0.0
1572780600	5	0.043
1572780600	6	0.056
1572780600	9	0.046
1572781500	2	0.02
1572781500	3	0.0
1572781500	5	0.031
1572781500	6	0.024
1572781500	9	0.036
1572782400	2	0.073
1572782400	3	0.0
1572782400	5	0.02
1572782400	6	0.013
1572782400	9	0.109
1572783300	2	0.029
1572783300	3	0.0
1572783300	5	0.021
1572783300	6	0.045
1572783300	9	0.014
1572784200	2	0.049
1572784200	3	0.0
1572784200	5	0.022
1572784200	6	0.054
1572784200	9	0.03
1572785100	2	0.052
1572785100	3	0.0
1572785100	5	0.021
1572785100	6	0.045
1572785100	9	0.05
1572786000	2	0.041
1572786000	3	0.0
1572786000	5	0.021
1572786000	6	0.039
1572786000	9	0.028
1572786900	2	0.044
1572786900	3	0.0
1572786900	5	0.021
1572786900	6	0.019
1572786900	9	0.003
1572787800	2	0.052
1572787800	3	0.0
1572787800	5	0.034
1572787800	6	0.023
1572787800	9	0.034
1572788700	2	0.045
1572788700	3	0.0
1572788700	5	0.046
1572788700	6	0.045
1572788700	9	0.038
1572789600	2	0.039
1572789600	3	0.0
1572789600	5	0.044
1572789600	6	0.055
1572789600	9	0.044
1572790500	2	0.052
1572790500	3	0.0
1572790500	5	0.045
1572790500	6	0.017
1572790500	9	0.001
1572791400	2	0.049
1572791400	3	0.0
1572791400	5	0.027
1572791400	6	0.021
1572791400	9	0.032
1572792300	2	0.038
1572792300	3	0.0
1572792300	5	0.038
1572792300	6	0.009
1572792300	9	0.024
1572793200	2	0.052
1572793200	3	0.0
1572793200	5	0.535
1572793200	6	0.006
1572793200	9	0.17
1572794100	2	0.05
1572794100	3	0.0
1572794100	5	0.523
1572794100	6	0.003
1572794100	9	0.001
1572795000	2	0.038
1572795000	3	0.0
1572795000	5	0.061
1572795000	6	0.002
1572795000	9	0.035
1572795900	2	0.047
1572795900	3	0.0
1572795900	5	0.06
1572795900	6	0.003
1572795900	9	0.019
1572796800	2	0.056
1572796800	3	0.0
1572796800	5	0.064
1572796800	6	0.006
1572796800	9	0.063
1572797700	2	0.04
1572797700	3	0.0
1572797700	5	0.038
1572797700	6	0.043
1572797700	9	0.001
1572798600	2	0.064
1572798600	3	0.0
1572798600	5	0.022
1572798600	6	0.041
1572798600	9	0.033
1572799500	2	0.066
1572799500	3	0.0
1572799500	5	0.022
1572799500	6	0.04
1572799500	9	0.012
1572800400	2	0.051
1572800400	3	0.0
1572800400	5	0.022
1572800400	6	0.035
1572800400	9	0.069
1572801300	2	0.071
1572801300	3	0.0
1572801300	5	0.027
1572801300	6	0.002
1572801300	9	0.007
1572802200	2	0.068
1572802200	3	0.0
1572802200	5	0.041
1572802200	6	0.002
1572802200	9	0.057
1572803100	2	0.066
1572803100	3	0.0
1572803100	5	0.062
1572803100	6	0.003
1572803100	9	0.009
1572804000	2	0.064
1572804000	3	0.0
1572804000	5	0.055
1572804000	6	0.002
1572804000	9	0.135
1572804900	2	0.061
1572804900	3	0.0
1572804900	5	0.055
1572804900	6	0.002
1572804900	9	0.03
1572805800	2	0.043
1572805800	3	0.0
1572805800	5	0.044
1572805800	6	0.002
1572805800	9	0.061
1572806700	2	0.06
1572806700	3	0.0
1572806700	5	0.033
1572806700	6	0.002
1572806700	9	0.019
1572807600	2	0.045
1572807600	3	0.0
1572807600	5	0.03
1572807600	6	0.003
1572807600	9	0.083
1572808500	2	0.027
1572808500	3	0.0
1572808500	5	0.026
1572808500	6	0.012
1572808500	9	0.065
1572809400	2	0.028
1572809400	3	0.0
1572809400	5	0.022
1572809400	6	0.043
1572809400	9	0.161
1572810300	2	0.014
1572810300	3	0.0
1572810300	5	0.022
1572810300	6	0.041
1572810300	9	0.001
1572811200	2	0.03
1572811200	3	0.0
1572811200	5	0.025
1572811200	6	0.041
1572811200	9	0.071
1572812100	2	0.022
1572812100	3	0.0
1572812100	5	0.047
1572812100	6	0.024
1572812100	9	0.015
1572813000	2	0.048
1572813000	3	0.0
1572813000	5	0.044
1572813000	6	0.002
1572813000	9	0.034
1572813900	2	0.087
1572813900	3	0.0
1572813900	5	0.043
1572813900	6	0.002
1572813900	9	0.001
1572814800	2	0.04
1572814800	3	0.0
1572814800	5	0.048
1572814800	6	0.003
1572814800	9	0.065
1572815700	2	0.055
1572815700	3	0.0
1572815700	5	0.024
1572815700	6	0.002
1572815700	9	0.022
1572816600	2	0.049
1572816600	3	0.0
1572816600	5	0.022
1572816600	6	0.002
1572816600	9	0.033
1572817500	2	0.039
1572817500	3	0.0
1572817500	5	0.022
1572817500	6	0.002
1572817500	9	0.001
1572818400	2	0.055
1572818400	3	0.0
1572818400	5	0.022
1572818400	6	0.003
1572818400	9	0.065
1572819300	2	0.048
1572819300	3	0.0
1572819300	5	0.022
1572819300	6	0.002
1572819300	9	0.146
1572820200	2	0.039
1572820200	3	0.007
1572820200	5	0.023
1572820200	6	0.02
1572820200	9	0.048
1572821100	2	0.056
1572821100	3	0.049
1572821100	5	0.06
1572821100	6	0.057
1572821100	9	0.034
1572822000	2	0.05
1572822000	3	0.049
1572822000	5	0.076
1572822000	6	0.068
1572822000	9	0.042
1572822900	2	0.058
1572822900	3	0.05
1572822900	5	0.078
1572822900	6	0.059
1572822900	9	0.064
1572823800	2	0.032
1572823800	3	0.049
1572823800	5	0.072
1572823800	6	0.053
1572823800	9	0.03
1572824700	2	0.024
1572824700	3	0.05
1572824700	5	0.057
1572824700	6	0.066
1572824700	9	0.025
1572825600	2	0.04
1572825600	3	0.05
1572825600	5	0.065
1572825600	6	0.072
1572825600	9	0.045
1572826500	2	0.026
1572826500	3	0.049
1572826500	5	0.89
1572826500	6	0.073
1572826500	9	0.059
1572827400	2	0.027
1572827400	3	0.05
1572827400	5	0.152
1572827400	6	0.037
1572827400	9	0.041
1572828300	2	0.038
1572828300	3	0.049
1572828300	5	0.066
1572828300	6	0.013
1572828300	9	0.018
1572829200	2	0.025
1572829200	3	0.05
1572829200	5	0.073
1572829200	6	0.012
1572829200	9	0.051
1572830100	2	0.028
1572830100	3	0.049
1572830100	5	0.08
1572830100	6	0.013
1572830100	9	0.273
1572831000	2	0.038
1572831000	3	0.05
1572831000	5	0.071
1572831000	6	0.012
1572831000	9	0.037
1572831900	2	0.024
1572831900	3	0.049
1572831900	5	0.069
1572831900	6	0.011
1572831900	9	0.093
1572832800	2	0.027
1572832800	3	0.05
1572832800	5	0.049
1572832800	6	0.011
1572832800	9	0.033
1572833700	2	0.037
1572833700	3	0.05
1572833700	5	0.044
1572833700	6	0.008
1572833700	9	0.043
1572834600	2	0.024
1572834600	3	0.049
1572834600	5	0.037
1572834600	6	0.008
1572834600	9	0.039
1572835500	2	0.026
1572835500	3	0.049
1572835500	5	0.04
1572835500	6	0.038
1572835500	9	0.0
1572836400	2	0.037
1572836400	3	0.05
1572836400	5	0.048
1572836400	6	0.028
1572836400	9	0.124
1572837300	2	0.026
1572837300	3	0.049
1572837300	5	0.05
1572837300	6	0.027
1572837300	9	0.035
1572838200	2	0.024
1572838200	3	0.05
1572838200	5	0.063
1572838200	6	0.002
1572838200	9	0.042
1572839100	2	0.025
1572839100	3	0.049
1572839100	5	0.069
1572839100	6	0.033
1572839100	9	0.004
1572840000	2	0.017
1572840000	3	0.049
1572840000	5	0.053
1572840000	6	0.044
1572840000	9	0.024
1572840900	2	0.01
1572840900	3	0.049
1572840900	5	0.037
1572840900	6	0.042
1572840900	9	0.036
1572841800	2	0.024
1572841800	3	0.049
1572841800	5	0.027
1572841800	6	0.041
1572841800	9	0.039
1572842700	2	0.018
1572842700	3	0.049
1572842700	5	0.027
1572842700	6	0.04
1572842700	9	0.014
1572843600	2	0.009
1572843600	3	0.049
1572843600	5	0.027
1572843600	6	0.02
1572843600	9	0.012
1572844500	2	0.023
1572844500	3	0.049
1572844500	5	0.027
1572844500	6	0.003
1572844500	9	0.038
1572845400	2	0.021
1572845400	3	0.049
1572845400	5	0.027
1572845400	6	0.002
1572845400	9	0.036
1572846300	2	0.009
1572846300	3	0.048
1572846300	5	0.038
1572846300	6	0.002
1572846300	9	0.027
1572847200	2	0.019
1572847200	3	0.049
1572847200	5	0.051
1572847200	6	0.002
1572847200	9	0.0
1572848100	2	0.024
1572848100	3	0.049
1572848100	5	0.048
1572848100	6	0.002
1572848100	9	0.038
1572849000	2	0.009
1572849000	3	0.048
1572849000	5	0.048
1572849000	6	0.003
1572849000	9	0.043
1572849900	2	0.016
1572849900	3	0.048
1572849900	5	0.026
1572849900	6	0.002
1572849900	9	0.033
1572850800	2	0.023
1572850800	3	0.048
1572850800	5	0.026
1572850800	6	0.002
1572850800	9	0.144
1572851700	2	0.013
1572851700	3	0.048
1572851700	5	0.025
1572851700	6	0.002
1572851700	9	0.032
1572852600	2	0.013
1572852600	3	0.049
1572852600	5	0.021
1572852600	6	0.002
1572852600	9	0.041
1572853500	2	0.032
1572853500	3	0.048
1572853500	5	0.021
1572853500	6	0.003
1572853500	9	0.03
1572854400	2	0.037
1572854400	3	0.049
1572854400	5	0.022
1572854400	6	0.002
1572854400	9	0.01
1572855300	2	0.02
1572855300	3	0.048
1572855300	5	0.029
1572855300	6	0.002
1572855300	9	0.014
1572856200	2	0.042
1572856200	3	0.049
1572856200	5	0.046
1572856200	6	0.002
1572856200	9	0.049
1572857100	2	0.038
1572857100	3	0.049
1572857100	5	0.044
1572857100	6	0.019
1572857100	9	0.022
1572858000	2	0.035
1572858000	3	0.021
1572858000	5	0.05
1572858000	6	0.044
1572858000	9	0.028
1572858900	2	0.028
1572858900	3	0.0
1572858900	5	0.032
1572858900	6	0.041
1572858900	9	0.0
1572859800	2	0.017
1572859800	3	0.0
1572859800	5	0.022
1572859800	6	0.04
1572859800	9	0.052
1572860700	2	0.019
1572860700	3	0.0
1572860700	5	0.022
1572860700	6	0.011
1572860700	9	0.028
1572861600	2	0.025
1572861600	3	0.0
1572861600	5	0.021
1572861600	6	0.008
1572861600	9	0.033
1572862500	2	0.01
1572862500	3	0.0
1572862500	5	0.022
1572862500	6	0.006
1572862500	9	0.0
1572863400	2	0.022
1572863400	3	0.0
1572863400	5	0.021
1572863400	6	0.005
1572863400	9	0.045
1572864300	2	0.022
1572864300	3	0.0
1572864300	5	0.024
1572864300	6	0.004
1572864300	9	0.062
1572865200	2	0.009
1572865200	3	0.0
1572865200	5	0.047
1572865200	6	0.006
1572865200	9	0.041
1572866100	2	0.067
1572866100	3	0.0
1572866100	5	0.043
1572866100	6	0.005
1572866100	9	0.119
1572867000	2	0.024
1572867000	3	0.0
1572867000	5	0.042
1572867000	6	0.012
1572867000	9	0.036
1572867900	2	0.008
1572867900	3	0.0
1572867900	5	0.027
1572867900	6	0.011
1572867900	9	0.053
1572868800	2	0.023
1572868800	3	0.0
1572868800	5	0.025
1572868800	6	0.005
1572868800	9	0.057
1572869700	2	0.019
1572869700	3	0.0
1572869700	5	0.037
1572869700	6	0.005
1572869700	9	0.007
1572870600	2	0.009
1572870600	3	0.0
1572870600	5	0.021
1572870600	6	0.005
1572870600	9	0.035
1572871500	2	0.021
1572871500	3	0.0
1572871500	5	0.029
1572871500	6	0.048
1572871500	9	0.032
1572872400	2	0.021
1572872400	3	0.0
1572872400	5	0.021
1572872400	6	0.046
1572872400	9	0.05
1572873300	2	0.008
1572873300	3	0.0
1572873300	5	0.022
1572873300	6	0.045
1572873300	9	0.106
1572874200	2	0.018
1572874200	3	0.0
1572874200	5	0.044
1572874200	6	0.045
1572874200	9	0.031
1572875100	2	0.022
1572875100	3	0.0
1572875100	5	0.044
1572875100	6	0.044
1572875100	9	0.018
1572876000	2	0.01
1572876000	3	0.0
1572876000	5	0.043
1572876000	6	0.045
1572876000	9	0.053
1572876900	2	0.015
1572876900	3	0.0
1572876900	5	0.034
1572876900	6	0.044
1572876900	9	0.01
1572877800	2	0.021
1572877800	3	0.0
1572877800	5	0.021
1572877800	6	0.043
1572877800	9	0.012
1572878700	2	0.013
1572878700	3	0.0
1572878700	5	0.023
1572878700	6	0.043
1572878700	9	0.025
1572879600	2	0.011
1572879600	3	0.0
1572879600	5	0.033
1572879600	6	0.043
1572879600	9	0.044
1572880500	2	0.022
1572880500	3	0.0
1572880500	5	0.032
1572880500	6	0.061
1572880500	9	0.033
1572881400	2	0.018
1572881400	3	0.0
1572881400	5	0.031
1572881400	6	0.051
1572881400	9	0.001
1572882300	2	0.014
1572882300	3	0.0
1572882300	5	0.027
1572882300	6	0.039
1572882300	9	0.034
1572883200	2	0.044
1572883200	3	0.0
1572883200	5	0.043
1572883200	6	0.039
1572883200	9	0.035
1572884100	2	0.035
1572884100	3	0.0
1572884100	5	0.051
1572884100	6	0.03
1572884100	9	0.04
1572885000	2	0.051
1572885000	3	0.0
1572885000	5	0.044
1572885000	6	0.028
1572885000	9	0.008
1572885900	2	0.05
1572885900	3	0.0
1572885900	5	0.046
1572885900	6	0.026
1572885900	9	0.012
1572886800	2	0.041
1572886800	3	0.001
1572886800	5	0.026
1572886800	6	0.003
1572886800	9	0.041
1572887700	2	0.051
1572887700	3	0.0
1572887700	5	0.036
1572887700	6	0.043
1572887700	9	0.029
1572888600	2	0.049
1572888600	3	0.001
1572888600	5	0.04
1572888600	6	0.052
1572888600	9	0.033
1572889500	2	0.037
1572889500	3	0.001
1572889500	5	0.034
1572889500	6	0.05
1572889500	9	0.0
1572890400	2	0.048
1572890400	3	0.0
1572890400	5	0.033
1572890400	6	0.017
1572890400	9	0.038
1572891300	2	0.051
1572891300	3	0.001
1572891300	5	0.032
1572891300	6	0.011
1572891300	9	0.042
1572892200	2	0.037
1572892200	3	0.001
1572892200	5	0.037
1572892200	6	0.011
1572892200	9	0.149
1572893100	2	0.046
1572893100	3	0.0
1572893100	5	0.057
1572893100	6	0.011
1572893100	9	0.013
1572894000	2	0.051
1572894000	3	0.001
1572894000	5	0.054
1572894000	6	0.05
1572894000	9	0.009
1572894900	2	0.039
1572894900	3	0.0
1572894900	5	0.053
1572894900	6	0.039
1572894900	9	0.066
1572895800	2	0.042
1572895800	3	0.001
1572895800	5	0.038
1572895800	6	0.011
1572895800	9	0.007
1572896700	2	0.051
1572896700	3	0.0
1572896700	5	0.031
1572896700	6	0.011
1572896700	9	0.033
1572897600	2	0.044
1572897600	3	0.001
1572897600	5	0.032
1572897600	6	0.011
1572897600	9	0.0
1572898500	2	0.037
1572898500	3	0.001
1572898500	5	0.031
1572898500	6	0.011
1572898500	9	0.052
1572899400	2	0.051
1572899400	3	0.0
1572899400	5	0.031
1572899400	6	0.011
1572899400	9	0.028
1572900300	2	0.048
1572900300	3	0.001
1572900300	5	0.037
1572900300	6	0.01
1572900300	9	0.017
1572901200	2	0.038
1572901200	3	0.0
1572901200	5	0.055
1572901200	6	0.011
1572901200	9	0.016
1572902100	2	0.046
1572902100	3	0.0
1572902100	5	0.072
1572902100	6	0.011
1572902100	9	0.011
1572903000	2	0.049
1572903000	3	0.0
1572903000	5	0.058
1572903000	6	0.063
1572903000	9	0.07
1572903900	2	0.039
1572903900	3	0.0
1572903900	5	0.057
1572903900	6	0.057
1572903900	9	0.0
1572904800	2	0.042
1572904800	3	0.0
1572904800	5	0.049
1572904800	6	0.051
1572904800	9	0.032
1572905700	2	0.057
1572905700	3	0.0
1572905700	5	0.033
1572905700	6	0.014
1572905700	9	0.0
1572906600	2	0.04
1572906600	3	0.036
1572906600	5	0.037
1572906600	6	0.046
1572906600	9	0.06
1572907500	2	0.037
1572907500	3	0.048
1572907500	5	0.052
1572907500	6	0.075
1572907500	9	0.02
1572908400	2	0.03
1572908400	3	0.048
1572908400	5	0.057
1572908400	6	0.018
1572908400	9	0.01
1572909300	2	0.019
1572909300	3	0.049
1572909300	5	0.049
1572909300	6	0.016
1572909300	9	0.022
1572910200	2	0.032
1572910200	3	0.048
1572910200	5	0.077
1572910200	6	0.056
1572910200	9	0.02
1572911100	2	0.032
1572911100	3	0.048
1572911100	5	1.129
1572911100	6	0.056
1572911100	9	0.058
1572912000	2	0.019
1572912000	3	0.046
1572912000	5	0.561
1572912000	6	0.051
1572912000	9	0.0
1572912900	2	0.028
1572912900	3	0.048
1572912900	5	0.08
1572912900	6	0.018
1572912900	9	0.032
1572913800	2	0.036
1572913800	3	0.049
1572913800	5	0.082
1572913800	6	0.022
1572913800	9	0.001
1572914700	2	0.046
1572914700	3	0.049
1572914700	5	0.066
1572914700	6	0.019
1572914700	9	0.077
1572915600	2	0.046
1572915600	3	0.049
1572915600	5	0.048
1572915600	6	0.018
1572915600	9	0.13
1572916500	2	0.034
1572916500	3	0.05
1572916500	5	0.039
1572916500	6	0.05
1572916500	9	0.0
1572917400	2	0.05
1572917400	3	0.049
1572917400	5	0.049
1572917400	6	0.05
1572917400	9	0.032
1572918300	2	0.047
1572918300	3	0.05
1572918300	5	0.084
1572918300	6	0.026
1572918300	9	0.024
1572919200	2	0.045
1572919200	3	0.049
1572919200	5	0.063
1572919200	6	0.011
1572919200	9	0.054
1572920100	2	0.022
1572920100	3	0.049
1572920100	5	0.044
1572920100	6	0.011
1572920100	9	0.0
1572921000	2	0.034
1572921000	3	0.048
1572921000	5	0.042
1572921000	6	0.011
1572921000	9	0.018
1572921900	2	0.034
1572921900	3	0.049
1572921900	5	0.038
1572921900	6	0.011
1572921900	9	0.014
1572922800	2	0.018
1572922800	3	0.048
1572922800	5	0.02
1572922800	6	0.011
1572922800	9	0.046
1572923700	2	0.023
1572923700	3	0.049
1572923700	5	0.025
1572923700	6	0.021
1572923700	9	0.031
1572924600	2	0.025
1572924600	3	0.049
1572924600	5	0.021
1572924600	6	0.042
1572924600	9	0.0
1572925500	2	0.01
1572925500	3	0.048
1572925500	5	0.021
1572925500	6	0.04
1572925500	9	0.032
1572926400	2	0.018
1572926400	3	0.048
1572926400	5	0.021
1572926400	6	0.007
1572926400	9	0.023
1572927300	2	0.025
1572927300	3	0.049
1572927300	5	0.021
1572927300	6	0.002
1572927300	9	0.041
1572928200	2	0.014
1572928200	3	0.05
1572928200	5	0.038
1572928200	6	0.002
1572928200	9	0.014
1572929100	2	0.014
1572929100	3	0.05
1572929100	5	0.044
1572929100	6	0.002
1572929100	9	0.0
1572930000	2	0.023
1572930000	3	0.049
1572930000	5	0.044
1572930000	6	0.003
1572930000	9	0.032
1572930900	2	0.017
1572930900	3	0.05
1572930900	5	0.042
1572930900	6	0.002
1572930900	9	0.043
1572931800	2	0.01
1572931800	3	0.05
1572931800	5	0.031
1572931800	6	0.002
1572931800	9	0.035
1572932700	2	0.023
1572932700	3	0.051
1572932700	5	0.021
1572932700	6	0.003
1572932700	9	0.0
1572933600	2	0.021
1572933600	3	0.049
1572933600	5	0.021
1572933600	6	0.002
1572933600	9	0.015
1572934500	2	0.009
1572934500	3	0.05
1572934500	5	0.021
1572934500	6	0.002
1572934500	9	0.032
1572935400	2	0.02
1572935400	3	0.05
1572935400	5	0.021
1572935400	6	0.003
1572935400	9	0.03
1572936300	2	0.022
1572936300	3	0.049
1572936300	5	0.021
1572936300	6	0.002
[truncated: 8,000 more rows]
